# Supplementary material
Source: ML conference proceedings conference paper supplement (https://proceedings.mlr.press/v119/xiong20a.html)
Supplement: Supplementary file [file xiong20a-supp.pdf]

---

# Supplementary Material for “On the Number of Linear Regions of Convolutional Neural Networks”

---

Huan Xiong<sup>1</sup> Lei Huang<sup>2</sup> Mengyang Yu<sup>2</sup> Li Liu<sup>2</sup> Fan Zhu<sup>2</sup> Ling Shao<sup>1,2</sup>

## 1. Preliminary on Hyperplane Arrangements

In this section, we recall some basic knowledge on hyperplane arrangements (Zaslavsky, 1975; Stanley, 2004), which will be used in the proofs of theorems in this paper. An affine hyperplane in a Euclidean space  $V \simeq \mathbb{R}^n$  is a subspace with the following form:  $H = \{X \in V : \alpha \cdot X = b\}$ , where “ $\cdot$ ” denotes the inner product,  $\mathbf{0} \neq \alpha \in V$  is called the *norm vector* of  $H$ , and  $b \in \mathbb{R}$ . For example, when  $V = \mathbb{R}^n$ , an affine hyperplane has the following form:  $\{(x_1, x_2, \dots, x_n) \in \mathbb{R}^n : \sum_{i=1}^n a_i x_i = b\}$  where  $a_i, b \in \mathbb{R}$  and there exists some  $i$  with  $a_i \neq 0$ . A finite *hyperplane arrangement*  $\mathcal{A}$  of a Euclidean space  $V$  is a finite set of affine hyperplanes in  $V$ . A *region* of an arrangement  $\mathcal{A} = \{H_i \subset V : 1 \leq i \leq m\}$  is defined as a connected component of  $V \setminus (\cup_{i=1}^m H_i)$ , which is a connected component of the complement of the union of the hyperplanes in  $\mathcal{A}$ . Let  $r(\mathcal{A})$  denote the number of regions for an arrangement  $\mathcal{A}$ . It is natural to ask: What is the maximal number of regions for an arrangement with  $m$  hyperplanes in  $\mathbb{R}^n$ ? The following Zaslavsky’s theorem answers this question.

**Proposition 1** (Zaslavsky’s Theorem (Zaslavsky, 1975; Stanley, 2004)). *Let  $\mathcal{A} = \{H_i \subset V : 1 \leq i \leq m\}$  be an arrangement in  $\mathbb{R}^n$ . Then, the number of regions for the arrangement  $\mathcal{A}$  satisfies*

$$r(\mathcal{A}) \leq \sum_{i=0}^n \binom{m}{i}. \quad (1)$$

Furthermore, the above equality holds iff  $\mathcal{A}$  is in general position, i.e., (i)  $\dim(\cap_{j=1}^k H_{i_j}) = n - k$  for any  $k \leq n$  and  $1 \leq i_1 < i_2 < \dots < i_j \leq m$ ; (ii)  $\cap_{j=1}^k H_{i_j} = \emptyset$  for any  $k > n$  and  $1 \leq i_1 < i_2 < \dots < i_j \leq m$ .

For example, if  $n = 2$  then a set of lines is in general position if no two are parallel and no three meet at a point. In this case, the number of regions of an arrangement  $\mathcal{A}$  with  $m$  lines in general position is equal to

$$r(\mathcal{A}) = \binom{m}{2} + m + 1. \quad (2)$$

For an arrangement  $\mathcal{A}$  and some  $H_0 \in \mathcal{A}$ , we define

$$\mathcal{A}^{H_0} := \{H \cap H_0 : H \in \mathcal{A}, H \neq H_0, H \cap H_0 \neq \emptyset\}$$

to be the set of nonempty intersections of  $H_0$  and other hyperplanes in  $\mathcal{A}$ . The following lemma gives a recursive method to compute  $r(\mathcal{A})$ .

**Lemma 1** (Lemma 2.1 from (Stanley, 2004)). *Let  $\mathcal{A}$  be an arrangement and  $H_0 \in \mathcal{A}$ . Then we have*

$$r(\mathcal{A}) = r(\mathcal{A} \setminus \{H_0\}) + r(\mathcal{A}^{H_0}).$$

Lemma 1 means that we can calculate the number of regions of an arrangement by induction.

Let  $\#\mathcal{A}$  be the number of hyperplanes in  $\mathcal{A}$  and  $\text{rank}(\mathcal{A})$  be the dimension of the space spanned by the normal vectors of the hyperplanes in  $\mathcal{A}$ . An arrangement  $\mathcal{A}$  is called *central* if  $\cap_{H \in \mathcal{A}} H \neq \emptyset$ .

---

<sup>1</sup>Mohamed bin Zayed University of Artificial Intelligence, UAE <sup>2</sup>Inception Institute of Artificial Intelligence, Abu Dhabi, UAE. Correspondence to: Huan Xiong <huan.xiong@mbzuai.ac.ae>.

**Lemma 2** (Theorems 2.4 and 2.5 from (Stanley, 2004)). *Let  $\mathcal{A}$  be an arrangement in an  $n$ -dimensional vector space. Then we have*

$$r(\mathcal{A}) = \sum_{\substack{\mathcal{B} \subseteq \mathcal{A} \\ \mathcal{B} \text{ central}}} (-1)^{\#\mathcal{B} - \text{rank}(\mathcal{B})}.$$

## 2. Proofs of Results for One-Layer CNNs

Let  $[n, m] := \{n, n+1, n+2, \dots, m\}$  be the set of integers from  $n$  to  $m$  and  $[m] := [1, m] = \{1, 2, \dots, m\}$ . We establish the following generalization of Zaslavsky's theorem, which is crucial in the proof of Theorem 2.

**Proposition 2.** *Let  $V = \mathbb{R}^n$ ,  $V_1, V_2, \dots, V_m$  be  $m$  nonempty subspaces of  $V$ , and  $n_1, n_2, \dots, n_m \in \mathbb{N}$  be some nonnegative integers. Let  $\mathcal{A} = \{H_{k,j} : 1 \leq k \leq m, 1 \leq j \leq n_k\}$  be an arrangement in  $\mathbb{R}^n$  with  $H_{k,j} = \{X \in V : \alpha_{k,j} \cdot X = b_{k,j}\}$  where  $\mathbf{0} \neq \alpha_{k,j} \in V_k$ ,  $b_{k,j} \in \mathbb{R}$ . Then, the number of regions for the arrangement  $\mathcal{A}$  satisfies*

$$r(\mathcal{A}) \leq \sum_{(i_1, i_2, \dots, i_m) \in K_{V; V_1, V_2, \dots, V_m}} \prod_{k=1}^m \binom{n_k}{i_k}, \quad (3)$$

where

$$K_{V; V_1, V_2, \dots, V_m} = \left\{ (i_1, i_2, \dots, i_m) : i_k \in \mathbb{N}, \sum_{k \in J} i_k \leq \dim \left( \sum_{k \in J} V_k \right) \forall J \subseteq [m] \right\}.$$

Furthermore, assume that the following two conditions hold for the arrangement  $\mathcal{A}$ :

(i) For each  $(i_1, i_2, \dots, i_m) \in K_{V; V_1, V_2, \dots, V_m}$ , any  $\sum_{k=1}^m i_k$  vectors with  $i_k$  distinct vectors chosen from the set  $\{\alpha_{k,j} : 1 \leq j \leq n_k\}$  are linear independent;

(ii) For each  $(i_1, i_2, \dots, i_m) \in \mathbb{N}^m \setminus K_{V; V_1, V_2, \dots, V_m}$ , the intersection of any  $\sum_{k=1}^m i_k$  hyperplanes with  $i_k$  distinct hyperplanes chosen from the set  $\{H_{k,j} : 1 \leq j \leq n_k\}$  are empty.

Then, the equality in (3) holds:

$$r(\mathcal{A}) = \sum_{(i_1, i_2, \dots, i_m) \in K_{V; V_1, V_2, \dots, V_m}} \prod_{k=1}^m \binom{n_k}{i_k}. \quad (4)$$

*Proof.* First, we will prove (3) by induction on  $\sum_{k=1}^m n_k$ . When  $\sum_{k=1}^m n_k = 0$ , both sides of (3) equals 1 since  $\binom{0}{0} = 1$ . When  $\sum_{k=1}^m n_k = 1$ , both sides equals 2 since  $\binom{1}{0} + \binom{1}{1} = 2$ . Suppose that the result is true for  $\sum_{k=1}^m n_k \leq N$  for some  $N \geq 1$ . Now consider the case  $\sum_{k=1}^m n_k = N + 1$ . Without loss of generality, assume  $n_1 \geq 1$ . Then  $H_{1,1} \in \mathcal{A}$ . Notice that the translation  $Y \rightarrow Y + Y_0$  for some  $Y_0 \in \mathbb{R}^n$  (i.e., translate all points in  $\mathbb{R}$  by a vector  $Y_0$ ) doesn't change the number of regions in  $\mathcal{A}$ . Thus we can assume  $b_{1,1} = 0$ . Then  $H_{1,1}$  becomes an  $(n-1)$ -dimensional subspace of  $V$ . Replace  $H_0$  in Lemma 1 with  $H_{1,1}$ , we obtain

$$r(\mathcal{A}) = r(\mathcal{A} \setminus \{H_{1,1}\}) + r(\mathcal{A}^{H_{1,1}}). \quad (5)$$

By induction hypothesis, we have

$$r(\mathcal{A} \setminus \{H_{1,1}\}) \leq \sum_{(i_1, i_2, \dots, i_m) \in K_{V; V_1, V_2, \dots, V_m}} \binom{n_1 - 1}{i_1} \prod_{k=2}^m \binom{n_k}{i_k} \quad (6)$$

and

$$r(\mathcal{A}^{H_{1,1}}) \leq \sum_{(i_1, i_2, \dots, i_m) \in K_{V \cap H_{1,1}; V_1 \cap H_{1,1}, V_2 \cap H_{1,1}, \dots, V_m \cap H_{1,1}}} \binom{n_1 - 1}{i_1} \prod_{k=2}^m \binom{n_k}{i_k}. \quad (7)$$

Let's consider (7) first. Since  $H_{1,1}$  is the orthogonal complement of the linear subspace generated by  $\alpha_{1,1}$ , and  $\mathbf{0} \neq \alpha_{1,1} \subset V_1$ , we have

$$H_{1,1} + V_1 = V.$$

Let  $V'_k = H_{1,1} \cap V_k$  for  $1 \leq k \leq m$ . Therefore, for each  $J \subseteq [2, m]$ , we have

$$\dim \left( H_{1,1} \cap \left( V_1 + \sum_{k \in J} V_k \right) \right) = \dim(H_{1,1}) + \dim \left( V_1 + \sum_{k \in J} V_k \right) - \dim(V) = \dim \left( V_1 + \sum_{k \in J} V_k \right) - 1 \quad (8)$$

and thus

$$\dim \left( V'_1 + \sum_{k \in J} V'_k \right) = \dim \left( V_1 + \sum_{k \in J} V_k \right) - 1. \quad (9)$$

On the other hand, it is trivial that

$$\dim \left( \sum_{k \in J} V'_k \right) \leq \dim \left( \sum_{k \in J} V_k \right) \quad (10)$$

for any  $J \subseteq [2, m]$ . Therefore, by (7) we derive

$$\begin{aligned} r(\mathcal{A}^{H_{1,1}}) &\leq \sum_{(i_1, i_2, \dots, i_m) \in K_{H_{1,1}; V'_1, V'_2, \dots, V'_m}} \binom{n_1 - 1}{i_1} \prod_{k=2}^m \binom{n_k}{i_k} \\ &\leq \sum_{\substack{i_1 - 1 + \sum_{k \in J} i_k \leq \dim(V'_1 + \sum_{k \in J} V'_k) \quad \forall J \subseteq [2, m] \\ \sum_{k \in J} i_k \leq \dim(\sum_{k \in J} V'_k) \quad \forall J \subseteq [2, m]}} \binom{n_1 - 1}{i_1 - 1} \prod_{k=2}^m \binom{n_k}{i_k} \\ &\leq \sum_{\substack{i_1 + \sum_{k \in J} i_k \leq \dim(V_1 + \sum_{k \in J} V_k) \quad \forall J \subseteq [2, m] \\ \sum_{k \in J} i_k \leq \dim(\sum_{k \in J} V_k) \quad \forall J \subseteq [2, m]}} \binom{n_1 - 1}{i_1 - 1} \prod_{k=2}^m \binom{n_k}{i_k} \\ &= \sum_{(i_1, i_2, \dots, i_m) \in K_{V; V_1, V_2, \dots, V_m}} \binom{n_1 - 1}{i_1 - 1} \prod_{k=2}^m \binom{n_k}{i_k}. \end{aligned} \quad (11)$$

Put (5), (6) and (11) together, we obtain

$$\begin{aligned} r(\mathcal{A}) &\leq \sum_{(i_1, i_2, \dots, i_m) \in K_{V; V_1, V_2, \dots, V_m}} \left( \binom{n_1 - 1}{i_1} \prod_{k=2}^m \binom{n_k}{i_k} + \binom{n_1 - 1}{i_1 - 1} \prod_{k=2}^m \binom{n_k}{i_k} \right) \\ &= \sum_{(i_1, i_2, \dots, i_m) \in K_{V; V_1, V_2, \dots, V_m}} \prod_{k=1}^m \binom{n_k}{i_k}, \end{aligned} \quad (12)$$

which completes the proof of (3).

Furthermore, assume that the arrangement  $\mathcal{A}$  satisfies the condition (i) and (ii). Then, the central sub-arrangements of  $\mathcal{A}$  are exactly the sub-arrangements  $\mathcal{B}$  consisting of  $\sum_{k=1}^m i_k$  hyperplanes with  $i_k$  distinct hyperplanes chosen from the set  $\{H_{k,j} : 1 \leq j \leq n_k\}$ , where  $(i_1, i_2, \dots, i_m) \in K_{V; V_1, V_2, \dots, V_m}$ . In this case,  $\#\mathcal{B} = \text{rank}(\mathcal{B}) = \sum_{k=1}^m i_k$ . Also, for any given  $(i_1, i_2, \dots, i_m) \in K_{V; V_1, V_2, \dots, V_m}$ , we have  $\binom{n_k}{i_k}$  choices to pick  $i_k$  hyperplanes from each  $\{\alpha_{k,i} : 1 \leq i \leq n_k\}$ . Therefore, by Lemma 2 we obtain

$$r(\mathcal{A}) = \sum_{\substack{\mathcal{B} \subseteq \mathcal{A} \\ \mathcal{B} \text{ central}}} (-1)^{\#\mathcal{B} - \text{rank}(\mathcal{B})} = \sum_{\substack{\mathcal{B} \subseteq \mathcal{A} \\ \mathcal{B} \text{ central}}} 1 = \sum_{(i_1, i_2, \dots, i_m) \in K_{V; V_1, V_2, \dots, V_m}} \prod_{k=1}^m \binom{n_k}{i_k}.$$

□

To prove Theorem 2, we need the following lemmas on picking distinct elements from the union of certain sets.

**Lemma 3.** Let  $S_1, S_2, \dots, S_m$  be  $m$  finite sets, and  $a_1, a_2, \dots, a_m$  be some nonnegative integers such that for any  $I \subseteq [m]$ ,

$$\sum_{i \in I} a_i \leq \# \bigcup_{i \in I} S_i. \quad (13)$$

Then, we can take  $a_i$  elements from each  $S_i$  such that these  $\sum_{i=1}^m a_i$  elements are distinct.

*Proof.* We will prove this lemma by induction on  $m$ . When  $m = 1$ , the claim is trivial. Now assume that the lemma holds for any  $1 \leq m < n$  and consider the case  $m = n$ . Without loss of generality, we assume that there exists some  $\emptyset \neq I \subseteq [n]$  such that (otherwise we can always increase some  $a_i$  to make the following equality holds for some  $I$ )

$$\sum_{i \in I} a_i = \# \bigcup_{i \in I} S_i. \quad (14)$$

The proof is divided into two cases.

Case (1): There exists some  $I$  satisfying (14) with  $\emptyset \neq I \neq [n]$ . In this case, we can assume that  $I = [r]$  for some  $1 \leq r \leq n - 1$  by symmetry, i.e.,

$$\sum_{i=1}^r a_i = \# \bigcup_{i=1}^r S_i. \quad (15)$$

Let

$$S'_j = S_{j+r} \setminus \bigcup_{i=1}^r S_i, \quad 1 \leq j \leq n - r.$$

Then  $(\bigcup_{j \in J} S'_j) \cap (\bigcup_{i=1}^r S_i) = \emptyset$ . Therefore, for any  $J \subseteq [n - r]$ , we have

$$\# \bigcup_{j \in J} S'_j = \# \left( \bigcup_{j \in J} S'_j \cup \bigcup_{i=1}^r S_i \right) - \# \bigcup_{i=1}^r S_i = \# \left( \bigcup_{j \in J} S_{j+r} \cup \bigcup_{i=1}^r S_i \right) - \# \bigcup_{i=1}^r S_i. \quad (16)$$

By (13) and (15) the above equality becomes

$$\# \bigcup_{j \in J} S'_j \geq \left( \sum_{j \in J} a_{j+r} + \sum_{i=1}^r a_i \right) - \sum_{i=1}^r a_i = \sum_{j \in J} a_{r+j}. \quad (17)$$

Since  $1 \leq \#I \leq n - 1$ , by induction we can pick  $a_i$  elements from each  $S_i$  for  $1 \leq i \leq r$ , and  $a_{r+j}$  elements from each  $S_{j+r}$  for  $1 \leq j \leq n - r$  such that these  $\sum_{i=1}^n a_i$  elements are distinct. Thus the claim holds.

Case (2): The only  $I$  satisfying (14) is  $I = [n]$ . Then  $\#S_1 > a_1$  and thus  $S_1 \cap \bigcup_{i=2}^n S_i \neq \emptyset$  (otherwise  $\sum_{i=1}^n a_i = \# \bigcup_{i=1}^n S_i = \#S_1 + \# \bigcup_{i=2}^n S_i > \sum_{i=1}^n a_i$ , a contradiction). Let  $x \in S_1 \cap \bigcup_{i=2}^n S_i$  and

$$S'_j = \begin{cases} S_j, & 2 \leq j \leq n; \\ S_j \setminus \{x\}, & j = 1. \end{cases}$$

Then  $\{S'_j : 1 \leq j \leq n\}$  still satisfies (13). But  $\sum_{i=1}^n \#S'_i < \sum_{i=1}^n \#S_i$ . Then  $\{S'_j : 1 \leq j \leq n\}$  either satisfies Case (1), which leads to a solution; or still in Case (2), which we can continue the process until Case (i) satisfies. This completes the proof.  $\square$

**Lemma 4.** Let  $S_1, S_2, \dots, S_m$  be  $m$  finite sets. Then, there exist some  $a_1, a_2, \dots, a_m \in \mathbb{N}$  such that

$$\sum_{i=1}^m a_i = \# \bigcup_{i=1}^m S_i, \quad (18)$$

and for any  $I \subseteq [m]$ ,

$$\sum_{i \in I} a_i \leq \# \bigcup_{i \in I} S_i. \quad (19)$$

*Proof.* We will prove it by Induction on  $m$ . The claim is trivial when  $m = 1$ . Now assume that  $m \geq 2$  and the result is true for  $m - 1$ . Therefore, we can pick some  $a_1, a_2, \dots, a_{m-1} \in \mathbb{N}$  such that

$$\sum_{i=1}^{m-1} a_i = \# \bigcup_{i=1}^{m-1} S_i, \quad (20)$$

and for any  $I \subseteq [m - 1]$ ,

$$\sum_{i \in I} a_i \leq \# \bigcup_{i \in I} S_i. \quad (21)$$

Furthermore, let  $a_m = \# \left( S_m \setminus \bigcup_{i=1}^{m-1} S_i \right)$ . Then, for any  $I \subseteq [m - 1]$ , we have

$$a_m + \sum_{i \in I} a_i \leq \# \bigcup_{i \in I} S_i + \# \left( S_m \setminus \bigcup_{i=1}^{m-1} S_i \right) \leq \# \bigcup_{i \in I \cup \{m\}} S_i. \quad (22)$$

Also,

$$\sum_{i=1}^m a_i = \# \bigcup_{i=1}^{m-1} S_i + \# \left( S_m \setminus \bigcup_{i=1}^{m-1} S_i \right) = \# \bigcup_{i=1}^m S_i. \quad (23)$$

Then the claim is also true for  $m$ . □

We also need the following lemmas on measure zero subsets of Euclidean spaces with respect to Lebesgue measure.

**Lemma 5.** *Let  $V \cong \mathbb{R}^n$  be a vector space. Then  $S = \{(v_1, v_2, \dots, v_n) \in V^n : v_1, v_2, \dots, v_n \text{ are linear dependent}\}$  is a measure zero subset of  $V^n$ , with respect to Lebesgue measure.*

*Proof.* Without loss of generality, assume  $V = \mathbb{R}^n$ . Let the  $i$ -th vector be  $v_i = (x_{i,1}, x_{i,2}, \dots, x_{i,n})$ . Then  $v_1, v_2, \dots, v_n$  are linear dependent iff

$$\det((x_{i,j})_{n \times n}) = 0,$$

whose left hand side is a non-zero polynomial of all  $x_{i,j}$ . It is easy to see that the solution of this polynomial has co-dimension 1 in  $\mathbb{R}^{n \times n}$ , thus  $S$  is a measure zero set. □

**Lemma 6.** *Let  $m > n$  be two given positive integers,  $A = (a_{ij})_{m \times n} \in \mathbb{R}^{m \times n}$  and  $C = (c_1, c_2, \dots, c_m) \in \mathbb{R}^m$ . Let  $S$  be the set of  $(A, C) \in \mathbb{R}^{m(n+1)}$  such that*

$$\begin{cases} a_{11}x_1 + a_{12}x_2 + \dots + a_{1n}x_n = c_1 \\ a_{21}x_1 + a_{22}x_2 + \dots + a_{2n}x_n = c_2 \\ \vdots \\ a_{m1}x_1 + a_{m2}x_2 + \dots + a_{mn}x_n = c_m \end{cases}$$

*has solutions for  $(x_1, x_2, \dots, x_n) \in \mathbb{R}^n$ . Then  $S$  is a measure zero subset of  $\mathbb{R}^{m(n+1)}$ , with respect to Lebesgue measure.*

*Proof.* By Lemma 5, the augmented matrix  $(A, C)$  has the rank  $(n + 1)$  except for a measure zero subset of  $\mathbb{R}^{m(n+1)}$ . On the other hand, the rank of the matrix  $A$  is at most  $n$ . Therefore, the rank of the augmented matrix  $(A, C)$  is larger than the rank of  $A$  except for a measure zero subset of  $\mathbb{R}^{m(n+1)}$ , thus by Rouché-Capelli Theorem (Shafarevich & Remizov, 2012) we obtain that (6) has no solutions except for a measure zero set of  $\mathbb{R}^{m(n+1)}$ . □

Lemma 3 implies the following results when we choose a basis of a linear space properly.

**Lemma 7.** Let  $V \cong \mathbb{R}^n$  be a vector space and  $V_i$  ( $1 \leq i \leq m$ ) be  $m$  subspaces of  $V$ . Suppose that some non-negative integers  $a_i$  ( $1 \leq i \leq m$ ) satisfy

$$\sum_{i \in I} a_i \leq \dim\left(\sum_{i \in I} V_i\right)$$

for each  $I \subseteq [m]$ . Then we obtain the following result.

- (i) We can pick  $a_i$  vectors from  $V_i$  for  $1 \leq i \leq m$  such that these  $\sum_{1 \leq i \leq m} a_i$  vectors are linear independent.
- (ii)  $\sum_{1 \leq i \leq m} a_i$  vectors with  $a_i$  vectors from  $V_i$  for  $1 \leq i \leq m$  such that they are linear dependent, forms a measure zero set in  $\prod_{i=1}^m V_i^{a_i}$ , with respect to Lebesgue measure.

*Proof.* (i) By linear algebra, we can construct a basis  $v_1, v_2, \dots, v_n$  of  $V$  such that each  $V_i$  has a basis which is a subset of  $v_1, v_2, \dots, v_n$ . Then, by Lemma 3 this claim holds.

(ii) Let  $n' = \sum_{1 \leq i \leq m} a_i$ . By (i) there exist  $n'$  linear independent vectors  $v_1, v_2, \dots, v_{n'}$  with  $a_i$  vectors from  $V_i$  for  $1 \leq i \leq m$ . Let  $\bar{V}_i'$  be the vector spaces generated by such  $a_i$  vectors in  $V_i$ . For any  $n'$  linear dependent vectors  $v'_1, v'_2, \dots, v'_{n'}$  with  $a_i$  vectors from  $V_i$  for  $1 \leq i \leq m$ , their projections  $v''_1, v''_2, \dots, v''_{n'}$  onto  $\prod_{i=1}^m \bar{V}_i'$  are also linear dependent. Suppose that  $v''_k = \sum_{j=1}^{n'} y_{k,j} v_j$  for  $1 \leq k \leq n'$ . If  $v'_k$  are chosen from  $V_{i_1}$ , such that  $v_j \notin V_{i_1}$ , we set  $y_{k,j} = 0$ . Otherwise, we set  $y_{k,j} = y'_{k,j}$ . Therefore,  $\#\{y'_{k,j}\}$  equals the dimension of the projection of  $\prod_{i=1}^m V_i^{a_i}$  onto  $\prod_{i=1}^m \bar{V}_i'$ . Also,  $v''_1, v''_2, \dots, v''_{n'}$  are linear dependent iff

$$\det((y_{k,j})_{n' \times n'}) = 0.$$

Since  $v_1, v_2, \dots, v_{n'}$  are linear independent, the left hand side  $\det((y_{k,j})_{n' \times n'})$  must be a non-zero polynomial of some  $y'_{k,j}$ . Therefore, the solution of this polynomial forms a measure zero set in  $\mathbb{R}^{\#\{y'_{k,j}\}}$  due to the zero measurability of the solutions of non-zero polynomial in Euclidean spaces (see (Lojasiewicz, 1964)). Thus such  $\sum_{1 \leq i \leq m} a_i$  vectors forms a measure zero set in  $\prod_{i=1}^m V_i^{a_i}$ , with respect to Lebesgue measure.  $\square$

Now we are ready to prove Theorem 2.

*Proof of Theorem 2.* By Definition 1, the number of linear regions of  $\mathcal{N}$  at  $\theta$  is equal to the number of regions of the hyperplane arrangement

$$\mathcal{A}_{\mathcal{N}, \theta} := \{H_{i,j,k}(X^0; \theta) : 1 \leq i \leq n_1^{(1)}, 1 \leq j \leq n_1^{(2)}, 1 \leq k \leq d_1\},$$

where  $H_{i,j,k}(X^0; \theta)$  is the hyperplane determined by  $Z_{i,j,k}^1(X^0; \theta) = 0$  (the expression of  $Z_{i,j,k}^1(X^0; \theta)$  is given in (2)). Recall that  $X^0 = (X_{a,b,c}^0)_{n_0^{(1)} \times n_0^{(2)} \times d_0}$ . Then  $H_{i,j,k}(X^0; \theta)$  can be written as

$$\langle \alpha_{i,j,k}, X^0 \rangle_F + B^{1,k} = 0,$$

where  $\langle \cdot, \cdot \rangle_F$  is the Frobenius inner product,  $\alpha_{i,j,k}$  is an  $n_0^{(1)} \times n_0^{(2)} \times d_0$  dimensional tensor, whose  $(a + (i-1)s_1, b + (j-1)s_1, c)$ -th element is  $W_{a,b,c}^{1,k}$  for all  $1 \leq a \leq f_1^{(1)}, 1 \leq b \leq f_1^{(2)}, 1 \leq c \leq d_0$ ; and 0 otherwise. Let

$$V_{i,j} = \{\beta \in \mathbb{R}^{n_0^{(1)} \times n_0^{(2)} \times d_0} : \beta_{a',b',c'} = 0 \ \forall (a', b', c') \neq (a + (i-1)s_1, b + (j-1)s_1, c)\}$$

be the subspace of  $\mathbb{R}^{n_0^{(1)} \times n_0^{(2)} \times d_0}$  generated by  $n_0^{(1)} \times n_0^{(2)} \times d_0$  dimensional tensors whose  $(a + (i-1)s_1, b + (j-1)s_1, c)$ -th element ranges over  $\mathbb{R}$  for all  $1 \leq a \leq f_1^{(1)}, 1 \leq b \leq f_1^{(2)}, 1 \leq c \leq d_0$ ; and 0 otherwise. Then  $\alpha_{i,j,k} \in V_{i,j}$  for  $1 \leq k \leq d_1$ . By Proposition 2, we obtain

$$r_{\mathcal{N}, \theta} = r(\mathcal{A}_{\mathcal{N}, \theta}) \leq \sum_{(i,j)(i,j) \in I_{\mathcal{N}} \in K_{V; (V_{i,j})_{(i,j) \in I_{\mathcal{N}}}}} \prod_{k=1}^m \binom{d_1}{t_{i,j}}, \quad (24)$$

where

$$\begin{aligned} K_{V;(V_{i,j})_{(i,j) \in I_{\mathcal{N}}}} &= \{(t_{i,j})_{(i,j) \in I_{\mathcal{N}}} : \sum_{(i,j) \in J} t_{i,j} \leq \dim \left( \sum_{(i,j) \in J} V_{i,j} \right) \forall J \subseteq I_{\mathcal{N}}\} \\ &= \{(t_{i,j})_{(i,j) \in I_{\mathcal{N}}} : t_{i,j} \in \mathbb{N}, \sum_{(i,j) \in J} t_{i,j} \leq \# \cup_{(i,j) \in J} S_{i,j} \forall J \subseteq I_{\mathcal{N}}\}, \end{aligned}$$

which gives an upper bound for  $R_{\mathcal{N},\theta}$  and  $R_{\mathcal{N}}$ . Next we will show that this upper bound can be reached except for a measure zero set in  $\mathbb{R}^{\#\text{weights}+\#\text{bias}}$  with respect to Lebesgue measure. By Lemmas 6 and 7, when  $\theta$  ranges over  $\mathbb{R}^{\#\text{weights}+\#\text{bias}}$ , the set of  $\theta$  such that  $A_{\mathcal{N},\theta}$  satisfies the conditions (i) and (ii) of Proposition 2 (replace  $\{i_k : 1 \leq k \leq m\}$  by  $\{t_{i,j} : (i,j) \in I_{\mathcal{N}}\}$ , and  $\{V_k : 1 \leq k \leq m\}$  by  $\{V_{i,j} : (i,j) \in I_{\mathcal{N}}\}$ ), forms a complement of a measure zero set in  $\mathbb{R}^{\#\text{weights}+\#\text{bias}}$ , with respect to Lebesgue measure. Then, for such parameters  $\theta$ , by Proposition 2 we derive the equality holds for (24), which implies that the maximal number  $R_{\mathcal{N}}$  of linear regions of  $\mathcal{N}$  is equal to

$$R_{\mathcal{N}} = \sum_{(t_{i,j})_{(i,j) \in I_{\mathcal{N}}} \in K_{\mathcal{N}}} \prod_{(i,j) \in I} \binom{d_1}{t_{i,j}},$$

and the right hand side of the above equality also equals the expectation of the number  $R_{\mathcal{N},\theta}$  of linear regions of  $\mathcal{N}$  with respect to the distribution  $\mu$  of weights and biases.  $\square$

The following result gives a simple example for Theorem 2.

**Corollary 1.** *Let  $\mathcal{N}$  be a one-layer ReLU CNN with input dimension  $1 \times n \times 1$ . Assume there are  $d_1$  filters with dimension  $1 \times 2 \times 1$  and stride  $s = 1$ . Thus the hidden layer dimension is  $1 \times (n-1) \times d_1$ . When  $n$  is fixed, we have*

$$R_{\mathcal{N}} = \frac{(n-1)}{2} d_1^n + \mathcal{O}(d_1^{n-1}). \quad (25)$$

*Proof.* By Theorem 2, we obtain

$$R_{\mathcal{N}} = \sum_{(t_{i,j})_{(i,j) \in I} \in K_{\mathcal{N}}} \prod_{(i,j) \in I} \binom{d_1}{t_{i,j}}. \quad (26)$$

Furthermore, when  $n$  is fixed,  $R_{\mathcal{N}}$  is a polynomial of  $d_1$  with degree  $n$  by Lemma 3 in the main paper. To calculate the coefficient of the leading term  $d_1^n$  of this polynomial, we need to determine all  $(t_{i,j})_{(i,j) \in I_{\mathcal{N}}} \in K_{\mathcal{N}}$  with  $\sum_{(i,j) \in I_{\mathcal{N}}} t_{i,j} = n$ . First, since  $n_1^{(1)} = 1$  and  $n_1^{(2)} = n-1$ , it is easy to see that  $I_{\mathcal{N}} = \{(1, j) : 1 \leq j \leq n-1\}$  and  $S_{1,j} = \{(1, j, 1), (1, j+1, 1)\}$  for each  $1 \leq j \leq n-1$ . Therefore,

$$K_{\mathcal{N}} = \{(t_{1,j})_{1 \leq j \leq n-1} : t_{1,j} \in \mathbb{N}, \sum_{j \in J} t_{1,j} \leq \# \cup_{(1,j) \in J} S_{1,j} \forall J \subseteq [n-1]\}. \quad (27)$$

Then, there are  $n-1$  vectors  $(t_{1,j})_{1 \leq j \leq n-1} \in K_{\mathcal{N}}$  satisfying  $\sum_{j=1}^{n-1} t_{1,j} = n$ :  $(2, 1, 1, \dots, 1)$ ,  $(1, 2, 1, \dots, 1)$ ,  $(1, 1, 2, 1, \dots, 1)$ ,  $\dots$ ,  $(1, 1, 1, \dots, 1, 2)$ . Therefore, the leading term in  $R_{\mathcal{N}}$  equals

$$(n-1) \binom{d_1}{2} d_1^{n-2} = \frac{(n-1)}{2} d_1^n - \frac{(n-1)}{2} d_1^{n-1}$$

and thus

$$R_{\mathcal{N}} = \frac{(n-1)}{2} d_1^n + \mathcal{O}(d_1^{n-1}). \quad (28)$$

This completes the proof.  $\square$

Next, we prove Lemma 3 and Theorem 3 in the main paper.

*Proof of Lemma 3 in the main paper.* Directly replace  $\{a_i : 1 \leq i \leq m\}$  by  $\{t_{i,j} : (i,j) \in I_{\mathcal{N}}\}$ , and  $\{S_i : 1 \leq i \leq m\}$  by  $\{S_{i,j} : (i,j) \in I_{\mathcal{N}}\}$  in Lemma 4, we derive the result.  $\square$

*Proof of Theorem 3.* It is easy to see that  $\binom{d_1}{t_{i,j}} = \Theta(d_1^{t_{i,j}})$  when  $d_1$  tends to infinity. Then, by Eq. (4) and Lemma 3 in the main paper, we have

$$R_{\mathcal{N}} = \Theta(d_1^{\#\cup_{(i,j) \in I_{\mathcal{N}}} S_{i,j}}). \quad (29)$$

Furthermore, if all input neurons have been involved in the convolutional calculation, we have

$$\cup_{(i,j) \in I_{\mathcal{N}}} S_{i,j} = \{(a,b,c) : 1 \leq a \leq n_0^{(1)}, 1 \leq b \leq n_0^{(2)}, 1 \leq c \leq d_0\} \quad (30)$$

and thus

$$R_{\mathcal{N}} = \Theta(d_1^{n_0^{(1)} \times n_0^{(2)} \times d_0}).$$

$\square$

### 3. Proofs of Results for Multi-Layer CNNs

In this section, we prove Theorem 5 on multi-layer ReLU CNNs.

*Proof of Theorem 4.* Assume that the parameters  $W$  and  $B$  for such two convolutional layers are the same as defined in Section 2. Let  $l = 1, 2$  in (2) in the main paper and  $X_{i,j,k}^l = Z_{i,j,k}^l(X^0; \theta)$ , we obtain

$$X_{i,j,k}^1 = \sum_{a=1}^{f_1^{(1)}} \sum_{b=1}^{f_1^{(2)}} \sum_{c=1}^{d_0} W_{a,b,c}^{1,k} X_{a+(i-1)s_1, b+(j-1)s_1, c}^0 + B^{1,k} \quad (31)$$

and

$$X_{i,j,k}^2 = \sum_{a=1}^{f_2^{(1)}} \sum_{b=1}^{f_2^{(2)}} \sum_{c=1}^{d_1} W_{a,b,c}^{2,k} X_{a+(i-1)s_2, b+(j-1)s_2, c}^1 + B^{2,k}. \quad (32)$$

Substitute (31) into (32), we derive

$$X_{i,j,k}^2 = \sum_{a'=1}^{f_2^{(1)}} \sum_{b'=1}^{f_2^{(2)}} \sum_{c'=1}^{d_1} \sum_{a=1}^{f_1^{(1)}} \sum_{b=1}^{f_1^{(2)}} \sum_{c=1}^{d_0} W_{a',b',c'}^{2,k} W_{a,b,c}^{1,c'} X_{a+(a'-1)s_2-1, b+(b'+(j-1)s_2-1)s_1, c}^0 + const \quad (33)$$

$$= \sum_{a'=1}^{f_2^{(1)}} \sum_{b'=1}^{f_2^{(2)}} \sum_{c'=1}^{d_1} \sum_{a=1}^{f_1^{(1)}} \sum_{b=1}^{f_1^{(2)}} \sum_{c=1}^{d_0} W_{a',b',c'}^{2,k} W_{a,b,c}^{1,c'} X_{a+(a'-1)s_1+(i-1)s_1s_2, b+(b'-1)s_1+(j-1)s_1s_2, c}^0 + const. \quad (34)$$

Note that  $1 \leq a + (a' - 1)s_1 \leq f_1^{(1)} + (f_2^{(1)} - 1)s_1$  and  $1 \leq b + (b' - 1)s_1 \leq f_1^{(2)} + (f_2^{(2)} - 1)s_1$ . Then (33) becomes

$$X_{i,j,k}^2 = \sum_{a=1}^{f_1^{(1)}+(f_2^{(1)}-1)s_1} \sum_{b=1}^{f_1^{(2)}+(f_2^{(2)}-1)s_1} \sum_{c=1}^{d_0} W_{a,b,c}^{2,k} X_{a+(i-1)s_2, b+(j-1)s_2, c}^0 + const \quad (35)$$

where  $W_{a,b,c}^{2,k}$  are some constants. Therefore,  $\mathcal{N}$  is realized as a ReLU CNN with one hidden convolutional layer such that its  $d_2$  filters has size  $(f_1^{(1)} + (f_2^{(1)} - 1)s_1) \times (f_1^{(2)} + (f_2^{(2)} - 1)s_1) \times d_0$  and stride  $s_1s_2$ , which completes the proof.  $\square$

*Proof of Theorem 5.* (i) The basic idea is to map many regions of the input space of each layer to the same set, thus identify many regions of space.



The  $L = 1$  case is guaranteed by Theorem 2. Next, we consider the case  $L \geq 2$ . Let  $p = \lfloor d_1/d_0 \rfloor$ . We set

$$W_{a,b,c}^{1,k} = \begin{cases} 1, & \text{if } a = b = 1, k = (c-1)p + 1, 1 \leq c \leq d_0; \\ 2, & \text{if } a = b = 1, (c-1)p + 2 \leq k \leq cp, 1 \leq c \leq d_0; \\ 0, & \text{otherwise} \end{cases} \quad (36)$$

and

$$B^{1,k} = \begin{cases} -(k - (c-1)p - 1), & \text{if } (c-1)p + 1 \leq k \leq cp \text{ for some } 1 \leq c \leq d_0; \\ 0, & \text{otherwise.} \end{cases} \quad (37)$$

Therefore, by (2) in the main paper we obtain

$$Z_{i,j,k}^1(X^0; \theta) = \begin{cases} X_{1+(i-1)s_1, 1+(j-1)s_1, c}^0, & \text{if } k = (c-1)p + 1 \text{ for some } 1 \leq c \leq d_0; \\ 2X_{1+(i-1)s_1, 1+(j-1)s_1, c}^0 - (k - (c-1)p - 1), & \text{if } (c-1)p + 2 \leq k \leq cp \text{ for some } 1 \leq c \leq d_0; \\ 0, & \text{otherwise.} \end{cases} \quad (38)$$

When  $W_{a,b,c}^{1,k}$  and  $B^{1,k}$  are given as in (36) and (37), the map

$$X_{i,j,k}^1 = \max\{0, Z_{i,j,k}^1(X^0; \theta)\} \quad (39)$$

determines a function

$$X^1 = \Phi_1(X^0) \quad (40)$$

from  $\mathbb{R}^{n_0^{(1)} \times n_0^{(2)} \times d_0}$  to  $\mathbb{R}^{n_1^{(1)} \times n_1^{(2)} \times d_1}$ .

For each  $i, j \in \mathbb{N}^+$ , let

$$\psi_i(x) = \begin{cases} \max\{0, x\}, & \text{if } i = 1; \\ \max\{0, 2x - (i-1)\}, & \text{if } i \geq 2 \end{cases} \quad (41)$$

and

$$\phi_j(x) = \sum_{i=1}^j (-1)^{i+1} \psi_i(jx). \quad (42)$$

Then it is easy to check that

$$\phi_j(x) = \begin{cases} 0, & \text{if } x \leq 0; \\ jx - i, & \text{if } \frac{i}{j} \leq x \leq \frac{2i+1}{2j} \leq \frac{1}{2} \text{ where } i \in \mathbb{N}; \\ i - jx, & \text{if } \frac{2i-1}{2j} \leq x \leq \frac{i}{j} \leq \frac{1}{2} \text{ where } i \in \mathbb{N}^+, \end{cases} \quad (43)$$

which means that  $\phi_j$  is an affine function when restricted to each interval  $[0, \frac{1}{2j}]$ ,  $[\frac{1}{2j}, \frac{2}{2j}]$ ,  $\dots$ ,  $[\frac{j-1}{2j}, \frac{1}{2}]$  and furthermore  $\phi_j([0, \frac{1}{2j}]) = \phi_j([\frac{1}{2j}, \frac{2}{2j}]) = \dots = \phi_j([\frac{j-1}{2j}, \frac{1}{2}]) = [0, \frac{1}{2}]$  (i.e.,  $\phi_j(x)$  sends  $j$  distinct intervals  $[0, \frac{1}{2j}]$ ,  $[\frac{1}{2j}, \frac{2}{2j}]$ ,  $\dots$ ,  $[\frac{j-1}{2j}, \frac{1}{2}]$  to the same interval  $[0, \frac{1}{2}]$ ).

Next, we define an intermediate convolutional layer (without activation functions) from

$$X^1 = (X_{a,b,c}^1)_{n_1^{(1)} \times n_1^{(2)} \times d_1}$$

to

$$Y^1 = (Y_{a,b,c}^1)_{n_1^{(1)} \times n_1^{(2)} \times d_0}$$

between the first and second hidden convolutional layers. We set the  $d_0$  filters with size  $1 \times 1 \times d_1$ , the stride 1, and define the weights  $W'$  and biases  $B'$  in this intermediate convolutional layer as

$$W'_{1,1,k} = \begin{cases} p \cdot (-1)^{i+1}, & \text{if } k = (c-1)p + i, \quad 1 \leq c \leq d_0; \\ 0, & \text{otherwise} \end{cases} \quad (44)$$

and

$$B'^{1,k} = 0 \quad \forall \quad 1 \leq k \leq d_0. \quad (45)$$

Then by (2) in the main paper,

$$Y_{a,b,c}^1 = p \sum_{i=1}^p (-1)^{i+1} X_{a,b,(c-1)p+i}^1 \quad (46)$$

for  $1 \leq a \leq n_1^{(1)}, 1 \leq b \leq n_1^{(2)}, 1 \leq c \leq d_0$ . Therefore, (46) determines an affine function

$$Y^1 = \Phi'_1(X^1) \quad (47)$$

from  $\mathbb{R}^{n_1^{(1)} \times n_1^{(2)} \times d_1}$  to  $\mathbb{R}^{n_1^{(1)} \times n_1^{(2)} \times d_0}$ . Therefore, we obtain

$$\begin{aligned} Y_{a,b,c}^1 &= p \sum_{i=1}^p (-1)^{i+1} X_{a,b,(c-1)p+i}^1 \\ &= p \sum_{i=1}^p (-1)^{i+1} \max\{0, Z_{a,b,(c-1)p+i}^1\} \\ &= \sum_{i=1}^p (-1)^{i+1} \psi_i(pX_{1+(a-1)s_1,1+(b-1)s_1,c}^0) \\ &= \phi_p(X_{1+(a-1)s_1,1+(b-1)s_1,c}^0). \end{aligned} \quad (48)$$

The third equality holds due to Eqs. (38) and (41). By the previous discussion on properties of the function  $\phi_j(x)$ , the following map  $\Psi_1 = \Phi'_1 \circ \Phi_1$  determined by Eq. (48)

$$\begin{array}{ccc} \Psi_1 : \mathbb{R}^{n_0^{(1)} \times n_0^{(2)} \times d_0} & \xrightarrow{\Phi_1} & \mathbb{R}^{n_1^{(1)} \times n_1^{(2)} \times d_1} & \xrightarrow{\Phi'_1} & \mathbb{R}^{n_1^{(1)} \times n_1^{(2)} \times d_0} \\ X^0 & \mapsto & X^1 & \mapsto & Y^1 \end{array}$$

sends  $\lfloor \frac{d_1}{d_0} \rfloor^{n_1^{(1)} \times n_1^{(2)} \times d_0} = p^{n_1^{(1)} \times n_1^{(2)} \times d_0}$  distinct hypercubes

$$\left\{ \left[0, \frac{1}{2p}\right], \left[\frac{1}{2p}, \frac{2}{2p}\right], \dots, \left[\frac{p-1}{2p}, \frac{p}{2p}\right] \right\}^{n_0^{(1)} \times n_0^{(2)} \times d_0}$$

in  $[0, \frac{1}{2}]^{n_0^{(1)} \times n_0^{(2)} \times d_0}$  onto the same hypercube  $[0, \frac{1}{2}]^{n_1^{(1)} \times n_1^{(2)} \times d_0}$  of the intermediate layer  $Y^1 \in \mathbb{R}^{n_1^{(1)} \times n_1^{(2)} \times d_0}$  (this map is affine and bijective when restricted to each of the  $\lfloor \frac{d_1}{d_0} \rfloor^{n_1^{(1)} \times n_1^{(2)} \times d_0}$  distinct hypercubes). Similarly (keep  $d_0$  unchanged, and replace  $n_0^{(1)}, n_0^{(2)}, n_1^{(1)}, n_1^{(2)}, d_1$  in  $\Psi_1$  by  $n_{l-1}^{(1)}, n_{l-1}^{(2)}, n_l^{(1)}, n_l^{(2)}, d_l$ ), we can define  $\Phi_l, \Phi'_l, \Psi_l$  and  $Y^l$  for  $2 \leq l \leq L-1$  such that the map

$$\begin{array}{ccc} \Psi_l : \mathbb{R}^{n_{l-1}^{(1)} \times n_{l-1}^{(2)} \times d_0} & \xrightarrow{\Phi_l} & \mathbb{R}^{n_l^{(1)} \times n_l^{(2)} \times d_l} & \xrightarrow{\Phi'_l} & \mathbb{R}^{n_l^{(1)} \times n_l^{(2)} \times d_0} \\ Y^{l-1} & \mapsto & X^{l-1} & \mapsto & Y^l \end{array}$$

sends  $\lfloor \frac{d_l}{d_0} \rfloor n_i^{(1)} \times n_i^{(2)} \times d_0$  distinct hypercubes

$$\left\{ \left[0, \frac{1}{2p}\right], \left[\frac{1}{2p}, \frac{2}{2p}\right], \dots, \left[\frac{p-1}{2p}, \frac{p}{2p}\right] \right\}^{n_{i-1}^{(1)} \times n_{i-1}^{(2)} \times d_0}$$

in  $[0, \frac{1}{2}]^{n_{i-1}^{(1)} \times n_{i-1}^{(2)} \times d_0}$  onto the hypercube  $[0, \frac{1}{2}]^{n_i^{(1)} \times n_i^{(2)} \times d_0}$  of the intermediate layer  $Y^l \in \mathbb{R}^{n_i^{(1)} \times n_i^{(2)} \times d_0}$ . Therefore,

$$\Psi_{L-1} \circ \Psi_{L-2} \circ \dots \circ \Psi_2 \circ \Psi_1 : \mathbb{R}^{n_0^{(1)} \times n_0^{(2)} \times d_0} \rightarrow \mathbb{R}^{n_{L-1}^{(1)} \times n_{L-1}^{(2)} \times d_0}$$

$$X^0 \mapsto Y^{L-1}$$

sends  $\prod_{l=1}^{L-1} \left\lfloor \frac{d_l}{d_0} \right\rfloor^{n_i^{(1)} \times n_i^{(2)} \times d_0}$  distinct hypercubes in  $[0, \frac{1}{2}]^{n_0^{(1)} \times n_0^{(2)} \times d_0}$  onto the same hypercube  $[0, \frac{1}{2}]^{n_{L-1}^{(1)} \times n_{L-1}^{(2)} \times d_0}$  of the intermediate layer. Note that  $\Phi_l \circ \Phi'_{l-1}$  is the convolutional layer between  $X^{l-1}$  and  $X^l$  which has  $d_l$  filter with size  $f_l^{(1)} \times f_l^{(2)} \times d_{l-1}$  and stride  $s_l$  due to Theorem 4. Finally, by Theorem 2, a one-layer ReLU CNN with input dimension  $n_{L-1}^{(1)} \times n_{L-1}^{(2)} \times d_0$  and output dimension  $n_L^{(1)} \times n_L^{(2)} \times d_L$  can divide the hypercube  $[0, \frac{1}{2}]^{n_{L-1}^{(1)} \times n_{L-1}^{(2)} \times d_0}$  into  $R_{\mathcal{N}'}$  regions. Put the network from  $X^0$  to  $Y^{L-1}$  and  $Y^{L-1}$  to  $X^L$  together, we prove the lower bound claim.

(ii) We will prove this claim by induction on  $L$ . When  $L = 1$ , by Theorem 2 the claim is true. Now suppose that  $L \geq 2$  and the claim is true for  $L - 1$ . Let  $\mathcal{N}^*$  be the CNN obtained from  $\mathcal{N}$  by deleting the  $L$ -th hidden layer (i.e.,  $\mathcal{N}^*$  consists of the first to the  $L - 1$ -th layer of  $\mathcal{N}$ ). Then by induction hypothesis, we have

$$R_{\mathcal{N}^*} \leq R_{\mathcal{N}''} \prod_{l=2}^{L-1} \sum_{i=0}^{n_0^{(1)} n_0^{(2)} d_0} \binom{n_l^{(1)} n_l^{(2)} d_l}{i}.$$

Now we consider the  $L$ -th layer. Suppose that the CNN  $\mathcal{N}^*$  with parameters  $\theta$  partitions the input space into  $m$  distinct linear regions  $\mathcal{R}_i$  ( $1 \leq i \leq m$ ). Since each linear region  $\mathcal{R}_i$  corresponds to a certain activation pattern, the function  $\mathcal{F}_{\mathcal{N}^*, \theta}$  becomes an affine function when restricted to  $\mathcal{R}_i$ . Therefore, after adding the  $L$ -th layer to  $\mathcal{N}^*$ , when restricted to  $\mathcal{R}_i$ , the function  $\mathcal{F}_{\mathcal{N}, \theta} |_{\mathcal{R}_i}$  can be realised as a one-layer NN with  $n_0^{(1)} n_0^{(2)} d_0$  input neurons and  $n_L^{(1)} n_L^{(2)} d_L$  hidden neurons. By Proposition 1,  $\mathcal{N}$  partitions  $\mathcal{R}_i$  into  $\sum_{i=0}^{n_0^{(1)} n_0^{(2)} d_0} \binom{n_L^{(1)} n_L^{(2)} d_L}{i}$  distinct linear regions. Finally, we obtain

$$R_{\mathcal{N}} \leq R_{\mathcal{N}^*} \sum_{i=0}^{n_0^{(1)} n_0^{(2)} d_0} \binom{n_L^{(1)} n_L^{(2)} d_L}{i} \leq R_{\mathcal{N}''} \prod_{l=2}^L \sum_{i=0}^{n_0^{(1)} n_0^{(2)} d_0} \binom{n_l^{(1)} n_l^{(2)} d_l}{i},$$

which completes the proof.  $\square$

#### 4. Calculation of the Number of Parameters for CNNs

*Proof of Lemma 4 in the main paper.* For the  $l$ -th layer, the  $k$ -th weight matrix  $W^{l,k}$  has  $f_l^{(1)} \times f_l^{(2)} \times d_{l-1}$  entries and there are  $d_l$  such weight matrices. The bias vector has length  $d_l$ . Thus there are  $f_l^{(1)} \times f_l^{(2)} \times d_{l-1} \times d_l + d_l$  parameters in the  $l$ -th hidden layer. Let  $l$  range from 1 to  $L$ , the total number of parameters equals  $\sum_{l=1}^L \left( f_l^{(1)} \times f_l^{(2)} \times d_{l-1} \times d_l + d_l \right)$ .  $\square$

#### 5. More Examples on the Maximal Number of Linear Regions for One-Layer ReLU CNNs

In this section, we list more examples on maximal number of linear regions for one-layer ReLU CNNs from Tables 1 to 5, which is calculated according to Theorem 2 in the main paper.

**Supplementary Material**

---

*Table 1.* The results for the maximal number of linear regions for a one-layer ReLU CNN with input dimension  $2 \times 2 \times 1$ ,  $d_1$  filters with dimension  $1 \times 2 \times 1$ , stride  $s = 1$ , and hidden layer dimension  $2 \times 1 \times d_1$ .

|                                | $d_1 = 1$ | $d_1 = 2$ | $d_1 = 3$ | $d_1 = 4$ | $d_1 = 5$ | $d_1 = 6$ | $d_1 = 7$ | $d_1 = 8$ |
|--------------------------------|-----------|-----------|-----------|-----------|-----------|-----------|-----------|-----------|
| $R_{\mathcal{N}}$ by Theorem 2 | 4         | 16        | 49        | 121       | 256       | 484       | 841       | 1369      |
| Upper bounds by Theorem 1      | 4         | 16        | 57        | 163       | 386       | 794       | 1471      | 2517      |
| Naive upper bounds             | 4         | 16        | 64        | 256       | 1024      | 4096      | 16384     | 65536     |

*Table 2.* The results for the maximal number of linear regions for a one-layer ReLU CNN with input dimension  $1 \times 4 \times 1$ ,  $d_1$  filters with dimension  $1 \times 2 \times 1$ , stride  $s = 1$ , and hidden layer dimension  $1 \times 3 \times d_1$ .

|                                | $d_1 = 1$ | $d_1 = 2$ | $d_1 = 3$ | $d_1 = 4$ | $d_1 = 5$ | $d_1 = 6$ | $d_1 = 7$ | $d_1 = 8$ |
|--------------------------------|-----------|-----------|-----------|-----------|-----------|-----------|-----------|-----------|
| $R_{\mathcal{N}}$ by Theorem 2 | 8         | 55        | 217       | 611       | 1396      | 2773      | 4985      | 8317      |
| Upper bounds by Theorem 1      | 8         | 57        | 256       | 794       | 1941      | 4048      | 7547      | 12951     |
| Naive upper bounds             | 8         | 64        | 512       | 4096      | 32768     | 262144    | 2097152   | 16777216  |

*Table 3.* The results for the maximal number of linear regions for a one-layer ReLU CNN with input dimension  $2 \times 3 \times 1$ ,  $d_1$  filters with dimension  $2 \times 2 \times 1$ , stride  $s = 1$ , and hidden layer dimension  $2 \times 1 \times d_1$ .

|                                | $d_1 = 1$ | $d_1 = 2$ | $d_1 = 3$ | $d_1 = 4$ | $d_1 = 5$ | $d_1 = 6$ | $d_1 = 7$ | $d_1 = 8$ |
|--------------------------------|-----------|-----------|-----------|-----------|-----------|-----------|-----------|-----------|
| $R_{\mathcal{N}}$ by Theorem 2 | 4         | 16        | 64        | 247       | 836       | 2424      | 6126      | 13829     |
| Upper bounds by Theorem 1      | 4         | 16        | 64        | 247       | 848       | 2510      | 6476      | 14893     |
| Naive upper bounds             | 4         | 16        | 64        | 256       | 1024      | 4096      | 16384     | 65536     |

*Table 4.* The results for the maximal number of linear regions for a one-layer ReLU CNN with input dimension  $6 \times 6 \times 1$ ,  $d_1$  filters with dimension  $1 \times 3 \times 1$ , stride  $s = 2$ , and hidden layer dimension  $3 \times 2 \times d_1$ .

|                                | $d_1 = 1$ | $d_1 = 2$ | $d_1 = 3$ | $d_1 = 4$ | $d_1 = 5$  | $d_1 = 6$   | $d_1 = 7$     | $d_1 = 8$       |
|--------------------------------|-----------|-----------|-----------|-----------|------------|-------------|---------------|-----------------|
| $R_{\mathcal{N}}$ by Theorem 2 | 64        | 4096      | 250047    | 9129329   | 191102976  | 2537716544  | 23664622311   | 167557540697    |
| Upper bounds by Theorem 1      | 64        | 4096      | 262144    | 16777216  | 1073741824 | 68719476736 | 4398045536122 | 281443698512817 |
| Naive upper bounds             | 64        | 4096      | 262144    | 16777216  | 1073741824 | 68719476736 | 4398046511104 | 281474976710656 |

*Table 5.* The results for the maximal number of linear regions for a one-layer ReLU CNN with input dimension  $3 \times 3 \times 2$ ,  $d_1$  filters with dimension  $2 \times 2 \times 2$ , stride  $s = 1$ , and hidden layer dimension  $2 \times 2 \times d_1$ .

|                                | $d_1 = 1$ | $d_1 = 2$ | $d_1 = 3$ | $d_1 = 4$ | $d_1 = 5$ | $d_1 = 6$ | $d_1 = 7$ | $d_1 = 8$  |
|--------------------------------|-----------|-----------|-----------|-----------|-----------|-----------|-----------|------------|
| $R_{\mathcal{N}}$ by Theorem 2 | 16        | 256       | 4096      | 65536     | 1048555   | 16721253  | 256376253 | 3459170397 |
| Upper bounds by Theorem 1      | 16        | 256       | 4096      | 65536     | 1048555   | 16721761  | 256737233 | 3485182163 |
| Naive upper bounds             | 16        | 256       | 4096      | 65536     | 1048576   | 16777216  | 268435456 | 4294967296 |

## References

- Lojasiewicz, S. Triangulation of semi-analytic sets. *Annali della Scuola Normale Superiore di Pisa-Classe di Scienze*, 18 (4):449–474, 1964.
- Shafarevich, I. R. and Remizov, A. O. *Linear algebra and geometry*. Springer Science & Business Media, 2012.
- Stanley, R. P. An introduction to hyperplane arrangements. In *Lecture Notes, IAS/Park City Mathematics Institute*, 2004.
- Zaslavsky, T. *Facing up to arrangements : face-count formulas for partitions of space by hyperplanes*. Number 154 in *Memoirs of the American Mathematical Society*. American Mathematical Society, 1975.
